# Supplementary material for: Land Use, Macroalgae, and a Tumor-Forming Disease in Marine Turtles
Source: PubMed Central journal article supplement (PMC2947502; doi:10.1371/journal.pone.0012900), 2010-09-29
Supplement: pone.0012900.s001.pdf [file pone.0012900.s001.pdf]

| Factors and Covariates in model | Model Structure                                    |       |     |            |               |
|---------------------------------|----------------------------------------------------|-------|-----|------------|---------------|
|                                 | (deterministic part)                               | D     | N   | Parameters | $\delta AICc$ |
| Null                            | $\beta_0 + \beta_1$                                | 0.053 | 235 | 2          | 349           |
| Null, polynomial (1)            | $\beta_0 + \beta_1 + \beta_2$                      | 0.051 | 235 | 3          | 328           |
| Null, polynomial (2)            | $\beta_0 + \beta_1 + \beta_2 + \beta_3$            | 0.050 | 235 | 4          | 328           |
| Island                          | $\beta_0 + \beta_1 + \psi_i$                       | 0.045 | 235 | 6          | 282           |
| Island, polynomial (1)          | $\beta_0 + \beta_1 + \beta_2 + \psi_i$             | 0.043 | 235 | 9          | 260           |
| Island, polynomial (2)          | $\beta_0 + \beta_1 + \beta_2 + \beta_3 + \psi_i$   | 0.042 | 235 | 12         | 263           |
| Island region                   | $\beta_0 + \beta_1 + \omega_i$                     | 0.026 | 235 | 24         | 71            |
| Island region, polynomial (1)   | $\beta_0 + \beta_1 + \beta_2 + \omega_i$           | 0.022 | 235 | 36         | 9             |
| Island region, polynomial (2)   | $\beta_0 + \beta_1 + \beta_2 + \beta_3 + \omega_i$ | 0.020 | 235 | 48         | 0             |

**Table S1**
