# Supplementary material for: Land Use, Macroalgae, and a Tumor-Forming Disease in Marine Turtles
Source: PubMed Central journal article supplement (PMC2947502; doi:10.1371/journal.pone.0012900), 2010-09-29
Supplement: pone.0012900.s002.pdf [file pone.0012900.s002.pdf]

| Time Period | N   | $\delta AICc$ |       |          | Log-normal parameters |         |
|-------------|-----|---------------|-------|----------|-----------------------|---------|
|             |     | Log-normal    | Gamma | Log-Sech | mean                  | std dev |
| 1982-1987   | 232 | 0             | 472   | 503      | 6.377                 | 0.297   |
| 1987-1992   | 588 | 0             | 1189  | 1262     | 6.335                 | 0.298   |
| 1993-1998   | 812 | 0             | 1676  | 1714     | 6.341                 | 0.256   |
| 1998-2003   | 873 | 0             | 1954  | 1965     | 6.359                 | 0.234   |
| 2004-2009   | 985 | 0             | 1970  | 2080     | 6.367                 | 0.254   |

**Table S2**
