# Supplementary material for: Land Use, Macroalgae, and a Tumor-Forming Disease in Marine Turtles
Source: PubMed Central journal article supplement (PMC2947502; doi:10.1371/journal.pone.0012900), 2010-09-29
Supplement: pone.0012900.s004.pdf [file pone.0012900.s004.pdf]

---

| <b>Model</b>             | <b>Kernel Features</b> | <b>N</b> | <b><math>\sigma</math></b> | <b><math>r^2</math></b> | <b><math>\delta AIC_c</math></b> |
|--------------------------|------------------------|----------|----------------------------|-------------------------|----------------------------------|
| Null (global regression) | ordinary least squares | 82       | 0.180                      | 0.450                   | -4*                              |
| GWR, distance            | fixed, 10km            | 82       | 0.150                      | 0.701                   | 9                                |
| GWR, distance            | fixed, 5km             | 82       | 0.143                      | 0.844                   | 85                               |
| GWR, distance            | fixed, 2km             | 82       | 0.082                      | 0.995                   | 1834                             |
| GWR, neighbors           | adaptive, 15           | 82       | 0.155                      | 0.723                   | 0                                |
| GWR, neighbors           | adaptive, 10           | 82       | 0.144                      | 0.820                   | 16                               |
| GWR, neighbors           | adaptive, 5            | 82       | 0.124                      | 0.949                   | 233                              |

**Table S4**
